# Supplementary material
Source: PubMed Central journal article supplement (PMC11416311)
Supplement: NIHMS2017391-supplement-Appendix_Table.pdf [file NIHMS2017391-supplement-Appendix_Table.pdf]

**Title: Historical Redlining and Contemporary Violent Victimization Over the Life Course**

**Authors:** Alexander Testa, PhD, Dylan B. Jackson, PhD, Reed DeAngelis, PhD, Nia Heard-Garris, MD, MBA, MSc, Daniel C. Semenza, PhD  
Odis Johnson, PhD

**Journal:** American Journal of Preventive Medicine

**Appendix Table 1.** Multilevel linear probability estimates of violent victimization over the life course: Add Health, Waves I, III, IV, and V (N = 8,266).

|                                        | Full Sample<br>(n = 8,266) |                     |            | Full Sample<br>(n = 8,266) |                       |            | Black<br>(n = 1,774) |                       |            | Hispanic<br>(n = 1,043) |                       |            | White<br>(n = 5,449) |                       |            |
|----------------------------------------|----------------------------|---------------------|------------|----------------------------|-----------------------|------------|----------------------|-----------------------|------------|-------------------------|-----------------------|------------|----------------------|-----------------------|------------|
| Intercept ( $\beta_0$ )                | <b>.071</b>                | <b>(.063, .079)</b> | <b>***</b> | <b>.096</b>                | <b>(.085, .108)</b>   | <b>***</b> | <b>.133</b>          | <b>(.110, .157)</b>   | <b>***</b> | <b>.120</b>             | <b>(.085, .154)</b>   | <b>***</b> | <b>.099</b>          | <b>(.087, .110)</b>   | <b>***</b> |
| Lives in a Redlined Area               |                            |                     |            |                            |                       |            |                      |                       |            |                         |                       |            |                      |                       |            |
| Between-person ( $\beta_1$ )           | <b>.073</b>                | <b>(.037, .108)</b> | <b>***</b> | <b>.048</b>                | <b>(.023, .074)</b>   | <b>***</b> | <b>.073</b>          | <b>(.033, .112)</b>   | <b>***</b> | .067                    | (-.013, .149)         |            | <b>.036</b>          | <b>(.003, .068)</b>   | <b>*</b>   |
| Within-person ( $\beta_2$ )            | <b>.039</b>                | <b>(.015, .062)</b> | <b>**</b>  | <b>.022</b>                | <b>(.004, .040)</b>   | <b>*</b>   | .013                 | (-.046, .072)         |            | .018                    | (-.064, .101)         |            | <b>.023</b>          | <b>(.002, .045)</b>   | <b>*</b>   |
| Time-Invariant Covariates ( $\beta'$ ) |                            |                     |            |                            |                       |            |                      |                       |            |                         |                       |            |                      |                       |            |
| Female                                 | —                          |                     |            | <b>-.070</b>               | <b>(-.079, -.061)</b> | <b>***</b> | <b>-.087</b>         | <b>(-.108, -.066)</b> | <b>***</b> | <b>-.085</b>            | <b>(-.114, -.056)</b> | <b>***</b> | <b>-.065</b>         | <b>(-.075, -.054)</b> | <b>***</b> |
| Black (vs. White)                      | —                          |                     |            | <b>.029</b>                | <b>(.009, .048)</b>   | <b>**</b>  | —                    |                       |            | —                       |                       |            | —                    |                       |            |
| Hispanic (vs. White)                   | —                          |                     |            | <b>.026</b>                | <b>(.007, .045)</b>   | <b>**</b>  | —                    |                       |            | —                       |                       |            | —                    |                       |            |
| Adolescent family SES                  | —                          |                     |            | <b>-.007</b>               | <b>(-.011, -.002)</b> | <b>**</b>  | -.003                | (-.011, .004)         |            | .003                    | (-.008, .013)         |            | <b>-.009</b>         | <b>(-.015, -.003)</b> | <b>**</b>  |
| Time-Varying Covariates ( $\beta''$ )  |                            |                     |            |                            |                       |            |                      |                       |            |                         |                       |            |                      |                       |            |
| Age                                    | —                          |                     |            | <b>-.004</b>               | <b>(-.004, -.003)</b> | <b>***</b> | <b>-.005</b>         | <b>(-.006, -.004)</b> | <b>***</b> | <b>-.007</b>            | <b>(-.009, -.005)</b> | <b>***</b> | <b>-.003</b>         | <b>(-.004, -.002)</b> | <b>***</b> |
| Education                              | —                          |                     |            | <b>-.016</b>               | <b>(-.020, -.013)</b> | <b>***</b> | <b>-.023</b>         | <b>(-.029, -.016)</b> | <b>***</b> | <b>-.026</b>            | <b>(-.036, -.017)</b> | <b>***</b> | <b>-.014</b>         | <b>(-.018, -.010)</b> | <b>***</b> |
| Tract proportion Black                 | —                          |                     |            | <b>.044</b>                | <b>(.008, .079)</b>   | <b>*</b>   | .025                 | (-.014, .064)         |            | .002                    | (-.162, .166)         |            | <b>.062</b>          | <b>(.011, .114)</b>   | <b>*</b>   |
| Tract proportion in poverty            | —                          |                     |            | .031                       | (-.012, .075)         |            | .051                 | (-.045, .146)         |            | -.006                   | (-.133, .121)         |            | .021                 | (-.032, .074)         |            |
| Tract population density               | —                          |                     |            | .000                       | (-.001, .001)         |            | .000                 | (-.002, .003)         |            | .000                    | (-.003, .002)         |            | .000                 | (-.001, .001)         |            |
| Random Components                      |                            |                     |            |                            |                       |            |                      |                       |            |                         |                       |            |                      |                       |            |
| Level-1 residual ( $\epsilon_{it}$ )   | .257                       | (.245, .269)        |            | .253                       | (.242, .264)          |            | .303                 | (.287, .321)          |            | .293                    | (.277, .309)          |            | .234                 | (.222, .246)          |            |
| Level-2 intercept ( $\mu_i$ )          | .074                       | (.066, .083)        |            | .065                       | (.056, .075)          |            | .069                 | (.049, .097)          |            | .062                    | (.042, .092)          |            | .063                 | (.053, .075)          |            |

Note: Unstandardized coefficients are reported with 95% confidence intervals in parentheses. Standard errors adjust for clustering by Wave I school. Coefficients are weighted using the level-1 respondent weight and level-2 school weight from Wave I (Chen and Harris 2020). Random components are reported in standard deviation units. Adolescent family SES, age, education, and tract-level covariates are centered on their respective means.

\* p < .05, \*\* p < .01, \*\*\* p < .001 (two-tailed).

Boldface indicates statistical significance
